# Supplementary material for: Evidence for Autoregulation and Cell Signaling Pathway Regulation From Genome-Wide Binding of the Drosophila Retinoblastoma Protein
Source: PubMed Central journal article supplement (PMC3484676; doi:10.1534/g3.112.004424), 2012-11-01
Supplement: supp_2.11.1459_FigureS4.pdf [file supp_2.11.1459_FigureS4.pdf]

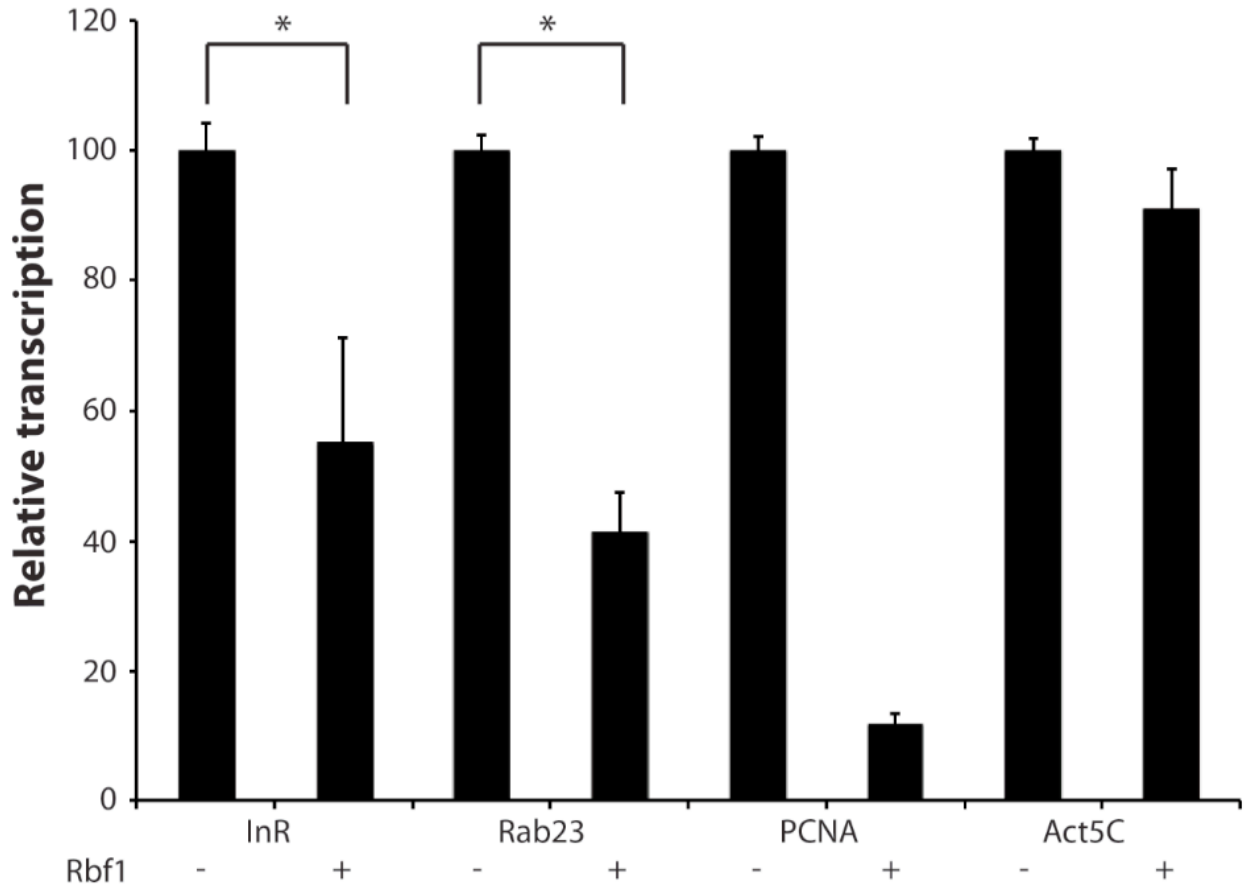

**Figure S4** Repression of *InR* and *Rab23* promoters by Rbf1. *Drosophila* S2 cells were cotransfected with *InR*, *Rab23*, *PCNA*, or *Act5C* luciferase reporters, with (+) or without (-) an Rbf1-expressing plasmid. Cells were harvested 72 h after transfection, and luciferase assay was performed. Results of four (*Act5c* luciferase), and six (*InR*, *Rab23*, and *PCNA* luciferase) biological replicates with three technical replicates each were pooled. Asterisks indicate  $p < 0.0001$ .
