# Supplementary material for: Evidence for Autoregulation and Cell Signaling Pathway Regulation From Genome-Wide Binding of the Drosophila Retinoblastoma Protein
Source: PubMed Central journal article supplement (PMC3484676; doi:10.1534/g3.112.004424), 2012-11-01
Supplement: supp_2.11.1459_FigureS7.pdf [file supp_2.11.1459_FigureS7.pdf]

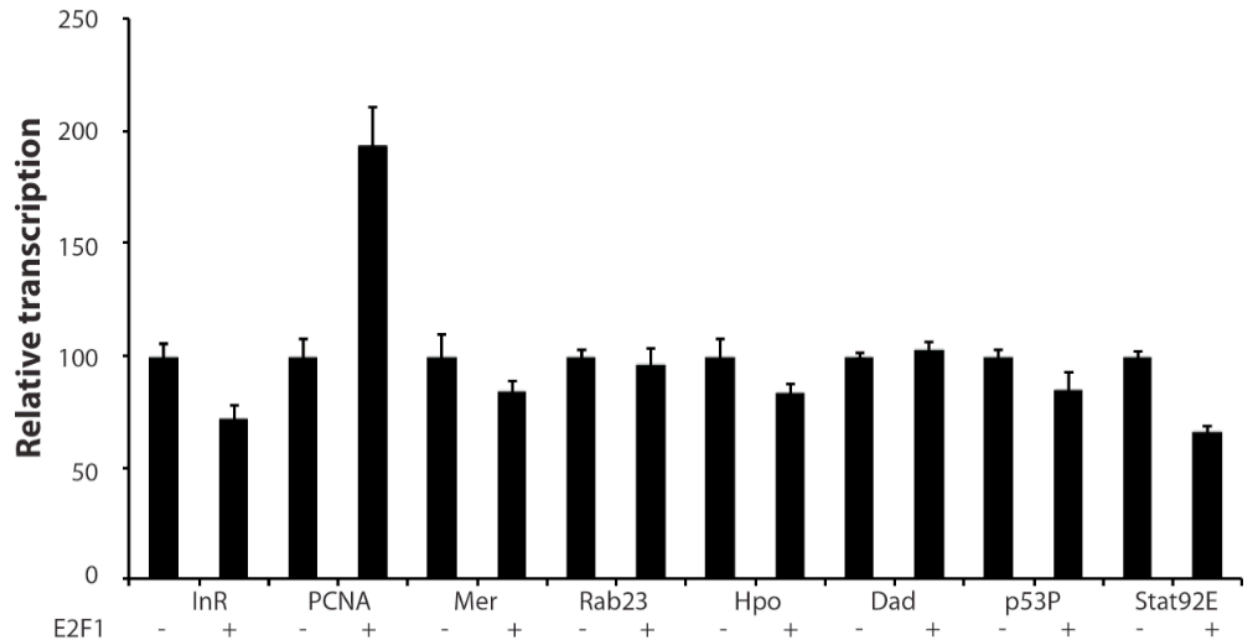

**Figure S7** E2F responsiveness of promoters of selected genes in signaling pathways. *Drosophila* S2 cells were cotransfected with *InR*, *PCNA*, *Merlin*, *Rab23*, *Hippo*, *Dad*, *p53-proximal*, or *Stat92E* luciferase reporters, with (+) or without (-) a plasmid overexpressing E2F1. Only *PCNA* luciferase expression was elevated by E2F1.
